# Supplementary material for: Co-Prescription Trends in a Large Cohort of Subjects Predict Substantial Drug-Drug Interactions
Source: PubMed Central journal article supplement (PMC4349653; doi:10.1371/journal.pone.0118991), 2015-03-04
Supplement: pone.0118991.s003.pdf [file pone.0118991.s003.pdf]

**Supporting Information Table S1. Number of abstracts containing a given number of drugs**

| <b>Number of drugs in Medline record<sup>a</sup></b> | <b>Medline record count</b> |
|------------------------------------------------------|-----------------------------|
| 1                                                    | 151116                      |
| 2                                                    | 26206                       |
| 3                                                    | 6390                        |
| 4                                                    | 1963                        |
| 5                                                    | 697                         |
| 6                                                    | 195                         |
| 7                                                    | 101                         |
| 8                                                    | 51                          |
| 9                                                    | 28                          |
| 10                                                   | 19                          |
| >10                                                  | 27                          |

<sup>a</sup> from the 133 subset of NHANES drugs used for text mining; see methods
